# Supplementary material for: Multidimensional Single-Cell Analysis of BCR Signaling Reveals Proximal Activation Defect As a Hallmark of Chronic Lymphocytic Leukemia B Cells
Source: PubMed Central journal article supplement (PMC3906024; doi:10.1371/journal.pone.0079987), 2014-01-29
Supplement: pone.0079987.s001.pdf [file pone.0079987.s001.pdf]

Table 1.

| Code | % Zap70+ cells | % CD38+ cells | Cytogenetics                 | V genes   | TTFT (months) |
|------|----------------|---------------|------------------------------|-----------|---------------|
| 1001 | 2.00           | 0.50          | del 13q                      | mutated   | 85.9          |
| 1002 | 50.00          | 1.20          | del 13q                      | unmutated | 1.2           |
| 1003 | 8.00           | 0.90          | del 13q                      | mutated   | 53.6          |
| 1004 | 80.00          | 60.40         | del 13q                      | unmutated | 34            |
| 1005 | 1.00           | 7.20          | del 13q, trisomy 12          | mutated   | Not reached   |
| 1006 | 75.00          | 16.10         | trisomy 12                   | unmutated | Not reached   |
| 1007 | 2.00           | 1.00          | del 13q                      | mutated   | 54.1          |
| 1008 | 82.00          | 55.10         | trisomy 12                   | unmutated | 0             |
| 1009 | 66.00          | 23.20         | normal                       | unmutated | 0.2           |
| 1010 | 76.00          | 97.80         | trisomy 12                   | unmutated | 12.8          |
| 1012 | 1.00           | 0.50          | del 13q                      | mutated   | 125           |
| 1013 | 6.00           | 28.70         | trisomy 12                   | unmutated | 31            |
| 1014 | 53.00          | 3.70          | del 17p                      | unmutated | 30.4          |
| 1015 | 6.00           | 4.00          | normal                       | mutated   | Not reached   |
| 1016 | 2.00           | 34.70         | normal                       | mutated   | Not reached   |
| 1017 | 30.00          | 24.60         | normal                       | mutated   | Not reached   |
| 1018 | 53.00          | 24.30         | del 11q, del 13q, trisomy 12 | unmutated | 12.4          |
| 1019 | 11.00          | 74.10         | trisomy 12                   | unmutated | Not reached   |
| 1021 | 16.00          | 2.60          | del 13q                      | unmutated | 13.2          |
| 1022 | 87.00          | 76.40         | del 13q                      | unmutated | 38.7          |
| 1023 | 64.00          | 39.50         | del 13q, del 11q             | mutated   | 4.1           |
| 1024 | 58.00          | 16.80         | del 13q                      | unmutated | 40.9          |
| 1025 | 71.00          | 51.50         | trisomy 12                   | unmutated | 45            |
| 1026 | 11.00          | 2.80          | n/a                          | unmutated | 9.6           |
| 1027 | 59.00          | 35.80         | del 13q                      | unmutated | 0             |
| 1028 | 15.00          | 3.90          | del 11q, del 13q             | unmutated | 20            |
| 1029 | 41.00          | 68.90         | del 11q, del 13q             | mutated   | 55            |
| 1030 | 32.00          | 19.00         | trisomy 12                   | unmutated | Not reached   |
| 1031 | 3.00           | 2.20          | del 13q                      | mutated   | 34            |
| 1032 | 4.00           | 2.20          | normal                       | n/a       | Not reached   |
| 1033 | 35.00          | 2.50          | del 11q, del 13q             | unmutated | 20.9          |
| 1034 | 50.00          | 90.70         | del 13q                      | mutated   | 16.1          |
| 1035 | 38.00          | 2.20          | del 13q                      | unmutated | 45            |
| 1036 | 1.00           | 3.30          | del 13q                      | n/a       | Not reached   |
| 1037 | 34.00          | 2.80          | del 13q, del 17p             | mutated   | Not reached   |
| 1038 | 2.00           | 1.90          | del 13q                      | mutated   | Not reached   |
| 1039 | 19.00          | 1.40          | del 17p                      | unmutated | 29.1          |
| 1040 | 16.00          | 33.00         | n/a                          | unmutated | 66.2          |
| 1041 | 46.00          | 19.70         | normal                       | unmutated | Not reached   |
| 1042 | 14.60          | 73.70         | del 11q, del 13q             | unmutated | 71.1          |
| 1043 | 45.80          | 31.50         | del 11q                      | unmutated | Not reached   |
| 1044 | 17.10          | 3.90          | normal                       | mutated   | Not reached   |
| 1045 | 26.00          | 1.20          | del 13q                      | unmutated | Not reached   |
| 1046 | 30.50          | 44.50         | del 17p                      | unmutated | 3             |

|      |       |       |                                              |           |             |
|------|-------|-------|----------------------------------------------|-----------|-------------|
| 1047 | 33.80 | 2.54  | n/a                                          | mutated   | 26.9        |
| 1048 | 27.60 | 0.59  | del 13q                                      | unmutated | Not reached |
| 1049 | 20.80 | 2.08  | del 13q                                      | mutated   | Not reached |
| 1050 | 17.80 | 1.00  | normal                                       | mutated   | Not reached |
| 1051 | 22.90 | 0.78  | del 13q                                      | mutated   | Not reached |
| 1052 | 16.60 | 0.70  | del 13q14                                    | mutated   | Not reached |
| 1053 | 25.80 | 1.75  | normal                                       | mutated   | Not reached |
| 1054 | 22.40 | 0.87  | normal                                       | unmutated | 70.8        |
| 1055 | 17.60 | 0.80  | normal                                       | unmutated | 55.5        |
| 1056 | 20.70 | 53.90 | del 13q14, loss of p53                       | unmutated | 26.3        |
| 1057 | 14.40 | 20.30 | del 13q14                                    | mutated   | 6.3         |
| 1058 | 24.30 | 3.82  | n/a                                          | mutated   | Not reached |
| 1059 | 26.50 | 1.50  | del 11q                                      | unmutated | 69.9        |
| 1061 | 8.58  | 1.19  | n/a                                          | mutated   | Not reached |
| 1062 | 18.20 | 2.62  | del 17p                                      | unmutated | 7.4         |
| 1063 | 29.30 | 1.13  | n/a                                          | mutated   | Not reached |
| 1064 | 23.00 | 1.27  | normal                                       | mutated   | Not reached |
| 1065 | 21.10 | 0.33  | del 13q                                      | mutated   | 196.3       |
| 1066 | 15.30 | 76.40 | normal                                       | unmutated | Not reached |
| 1067 | 33.60 | 5.28  | n/a                                          | unmutated | Not reached |
| 1068 | 15.70 | 2.70  | del 13q                                      | mutated   | 233.8       |
| 1069 | 25.80 | 0.47  | del 13q                                      | mutated   | Not reached |
| 1070 | 22.70 | 21.10 | normal                                       | unmutated | 78.7        |
| 1071 | 36.10 | 1.15  | del 13q                                      | mutated   | 191.8       |
| 1072 | 12.50 | 2.32  | normal                                       | mutated   | Not reached |
| 1073 | 35.80 | 4.83  | del 13q                                      | unmutated | 25.5        |
| 1074 | 38.20 | 6.04  | del 17p                                      | mutated   | 196         |
| 1075 | 6.30  | 6.97  | del 17p, del 11q, monosomy 6,<br>loss of p53 | unmutated | 15.7        |
| 1076 | 27.10 | 1.40  | del 13q, del 6q, del 11q and<br>loss of p53  | mutated   | Not reached |
| 1077 | 19.50 | 5.10  | del 13q and loss of p53                      | mutated   | Not reached |
| 1078 | 17.10 | 35.70 | trisomy 12, 1p38<br>rearrangement            | unmutated | 7.3         |
| 1079 | 31.30 | 39.50 | del 13q                                      | unmutated | 16.5        |
| 1080 | 15.00 | 1.62  | del 13q                                      | mutated   | 6.4         |
| 1081 | 39.80 | 61.00 | del 13q, trisomy 18                          | mutated   | 32.5        |
| 1082 | 19.30 | 5.79  | trisomy 12                                   | mutated   | 10.7        |
| 1083 | 45.50 | 89.20 | trisomy 12                                   | unmutated | 63.5        |
| 1084 | 4.60  | 67.80 | trisomy 12                                   | mutated   | Not reached |
| 1085 | 16.60 | 0.26  | normal                                       | mutated   | Not reached |
| 1086 | 35.00 | 0.08  | n/a                                          | mutated   | Not reached |
| 1087 | 35.60 | 0.15  | del 13q                                      | mutated   | Not reached |
| 1088 | 35.50 | 0.83  | normal                                       | mutated   | Not reached |
| 1089 | 40.20 | 53.40 | normal                                       | unmutated | Not reached |
| 1090 | 12.70 | 1.40  | del 13q                                      | mutated   | Not reached |
| 1091 | 19.80 | 0.30  | del 13q and loss of p53                      | mutated   | 36.3        |
| 1092 | 15.90 | 16.10 | trisomy 12                                   | mutated   | Not reached |

!

|      |       |       |                                            |           |             |
|------|-------|-------|--------------------------------------------|-----------|-------------|
| 1093 | 29.20 | 7.53  | del 13q                                    | mutated   | 36.3        |
| 1095 | 26.40 | 53.00 | del 13q and del 11q                        | mutated   | 27.5        |
| 1096 | 7.50  | 8.97  | complex cytogenetics including loss of p53 | unmutated | Not reached |
| 1097 | 45.70 | 72.60 | n/a                                        | mutated   | 57.4        |
| 1098 | 18.40 | 50.60 | del 13q                                    | unmutated | 60.6        |
| 1100 | n/a   | n/a   | trisomy 12                                 | unmutated | Not reached |
| 1101 | 13.20 | 1.46  | normal                                     | mutated   | Not reached |
| 1102 | 18.70 | 0.39  | del 13q                                    | mutated   | Not reached |
| 1103 | 32.60 | 0.43  | del 13q                                    | mutated   | Not reached |
| 1104 | 7.08  | 0.10  | del 13q                                    | mutated   | Not reached |
| 1105 | 1.39  | 0.12  | n/a                                        | mutated   | Not reached |
| 1106 | 3.88  | 0.08  | normal                                     | n/a       | Not reached |
| 1107 | 11.80 | 0.23  | trisomy 12                                 | unmutated | Not reached |
| 1108 | 8.46  | 0.26  | del 13q and loss of p53                    | n/a       | Not reached |
| 1109 | 1.91  | 0.04  | del 13q                                    | mutated   | Not reached |
| 1110 | n/a   | n/a   | normal                                     | unmutated | Not reached |
